# Supplementary material
Source: publisher figshare collection journal article supplement (https://acs.figshare.com/ndownloader/files/3726466)
Supplement: Supplementary file 1 [file 3726466]

Supporting Information

**Metal oxide catalyzed efficient conversion of cellulose to oxalic acid in alkaline solution  
under low oxygen pressure**

*Zhiwei Jiang, Zhanrong Zhang, Jinliang Song, Qinglei Meng, Huacong Zhou, Zhenhong He,  
Buxing Han\**

Beijing National Laboratory for Molecular Sciences, CAS Key Laboratory of Colloid and  
Interface and Chemical Thermodynamics, Institute of Chemistry, Chinese Academy of  
Sciences, Beijing, 100190, China

\* Corresponding Author. Tel.: +86-10-62562821. E-mail: [Hanbx@iccas.ac.cn](mailto:Hanbx@iccas.ac.cn).

Number of Pages: 2 (including cover page)

Number of Figures: 1

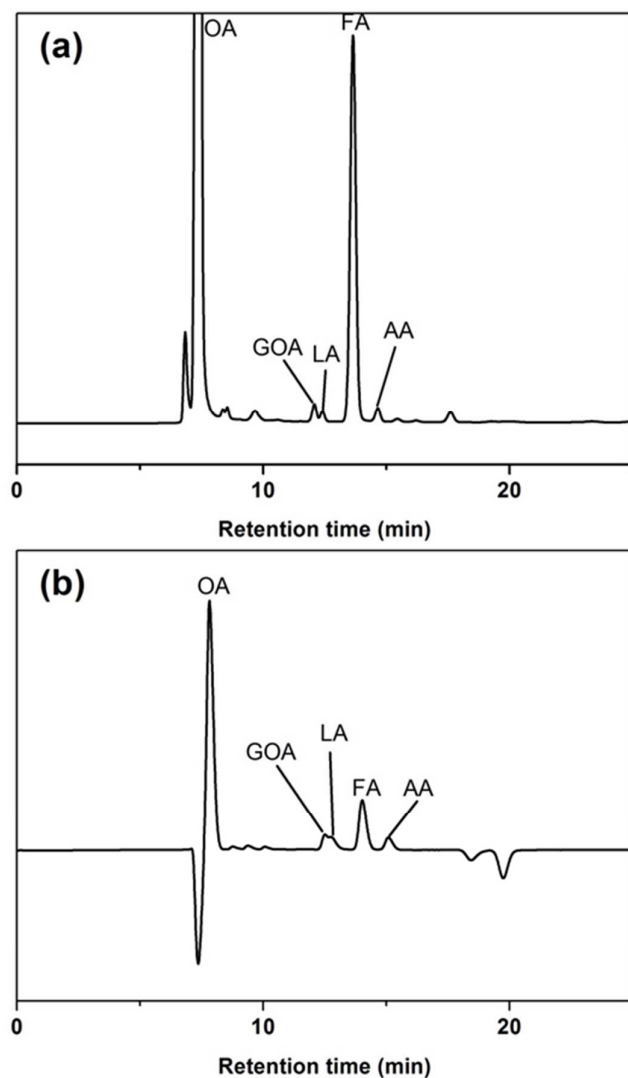

**Figure S1.** Typical HPLC-UV (a) and HPLC-RI (b) chromatograms of the liquid sample after the reaction. Reaction conditions: 0.02 g of MCC, 0.25 mmol CuO, 2.0 mol L<sup>-1</sup> NaOH, 2.0 ml of water, 190 °C, 2 h, 0.3 MPa O<sub>2</sub>
